# Supplementary material
Source: Springer Nature journal article supplement (https://www.springermedizin.de/resource/supplementary/12889_2014_6883_MOESM1_ESM.pdf/9499238)

## HPV IMPACT PROFILE

We are interested in understanding how women's gynecological health or reproductive health may affect their everyday life. Please think about your most recent experience visiting your gynecologist, having a Pap test, and any other procedures you have had done and test results when answering these questions. Check the ONE best answer for each question.

1. When I think about my recent gynecology exam or test results, I feel good about myself.

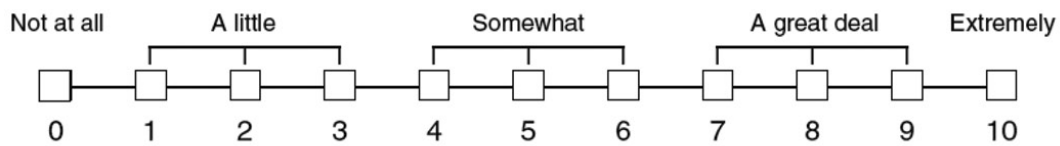

2. When I think about my recent gynecology exam or test results, I feel anxious.

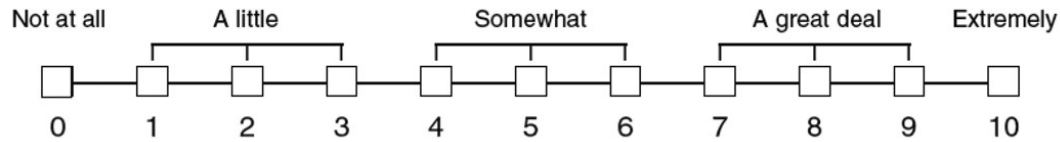

3. I feel my recent gynecology test results were unexpected.

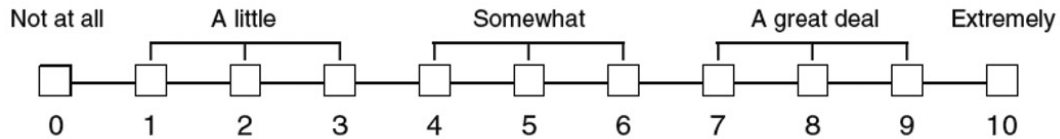

4. When I think about my recent gynecology exam or test results, I feel in control of my health.

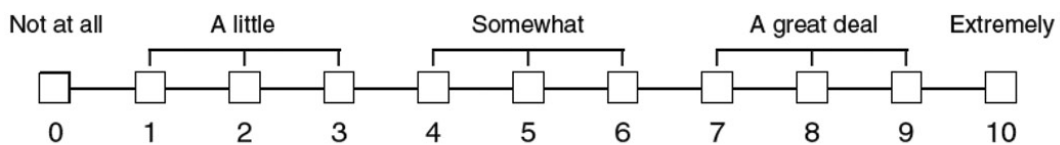

5. When I think about my recent gynecology exam or test results, I feel depressed.

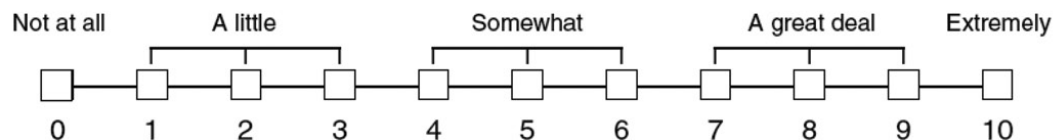

6. After my recent gynecology exam or test results, I feel I can concentrate as well as usual on everyday matters.

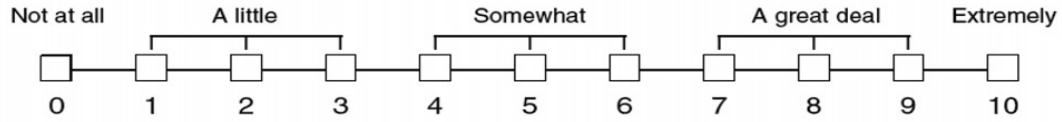

7. When I think about my recent gynecology exam or test results, I feel something is seriously wrong with me.

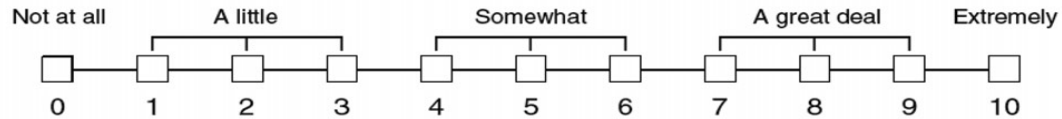

8. When I think about my recent gynecology exam or test results, I feel angry.

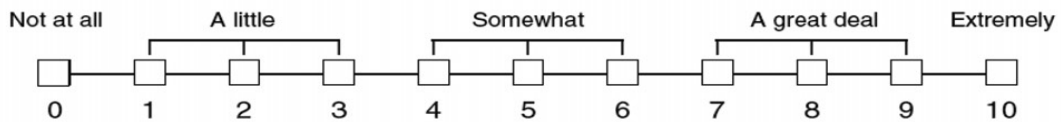

9. After my recent gynecology exam or test results, I feel confident my partner will accept me.

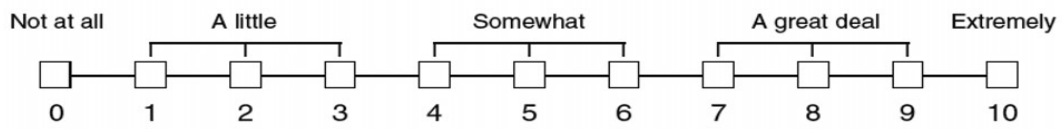

10. When I think about my recent gynecology exam or test results, I feel my body is sexually attractive.

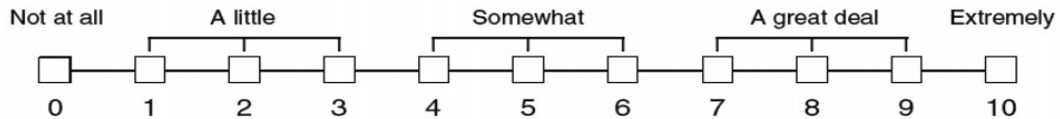

11. When I think about my recent gynecology exam or test results, I feel ashamed.

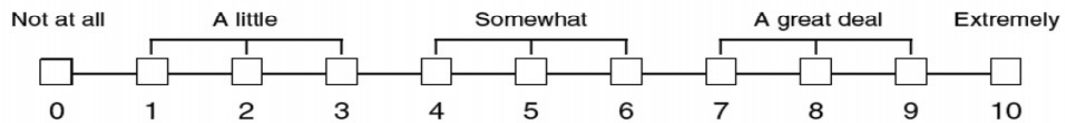

12. I feel concerned about having genital warts.

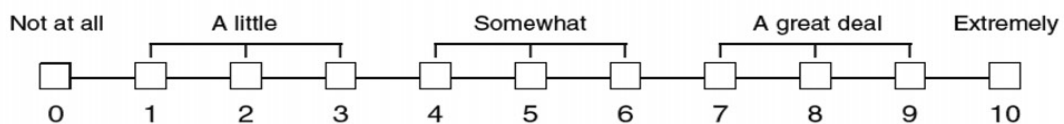

13. I am worried there are no treatments to cure genital warts.

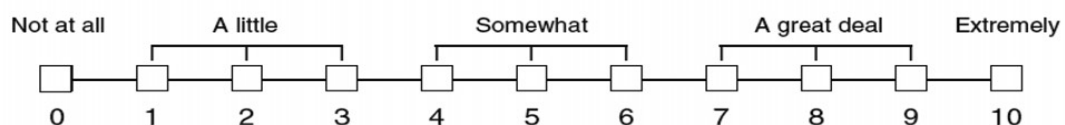

14. After my recent gynecology exam or test results, I feel optimistic about my future gynecological health.

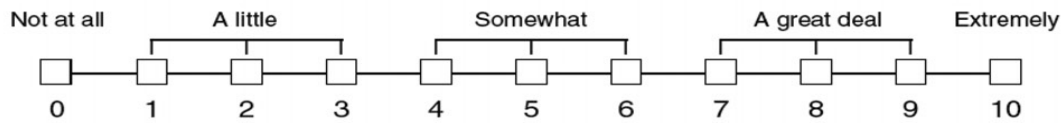

15. I am worried about having abnormal Pap test results.

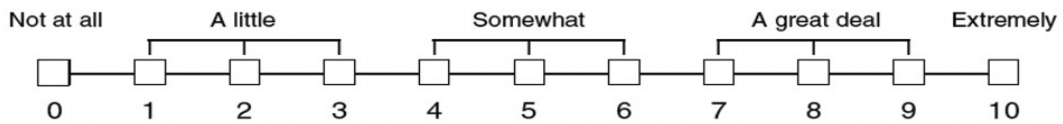

16. I am worried that there is no cure for what causes an abnormal Pap test.

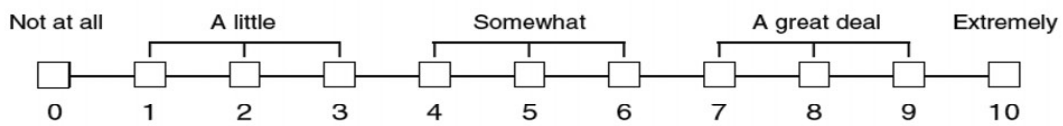

17. I am worried about my fertility because of my recent gynecological health or test results.

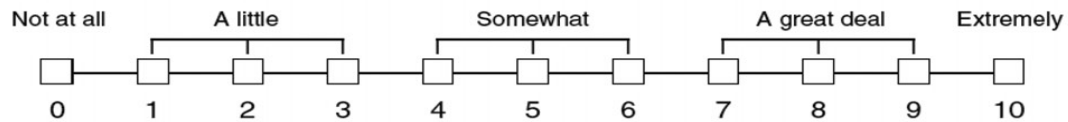

18. I am concerned I will get cervical cancer in the future.

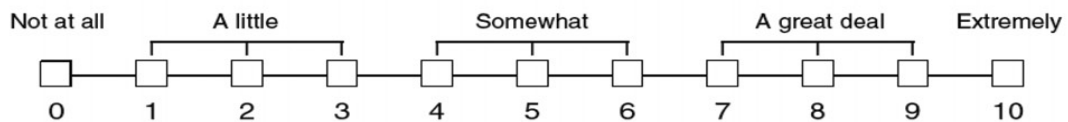

19. I am worried that there are no treatments to cure cervical cancer.

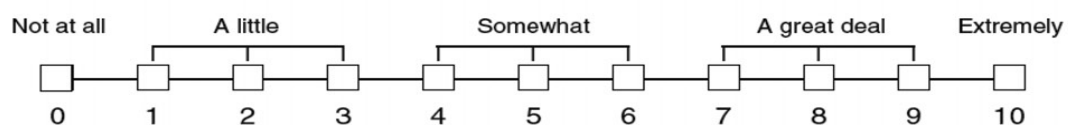

20. I am worried about having pain during future gynecologist visits.

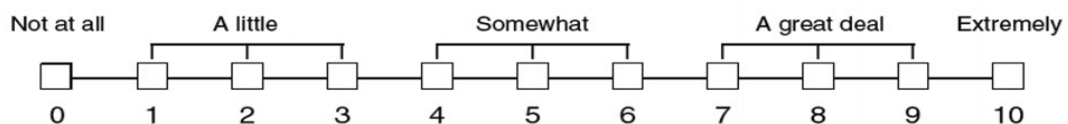

21. After my recent gynecology exam or test results, I am worried that having sex with my partner may give him/her an infection.

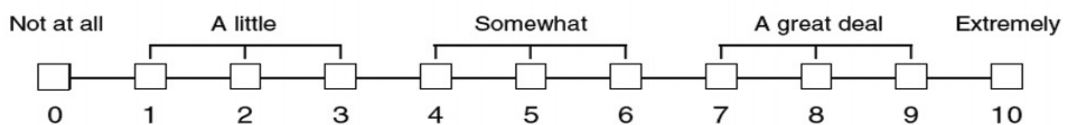

22. After my recent gynecology exam or test results, I am worried that having sex with my partner may give me an infection.

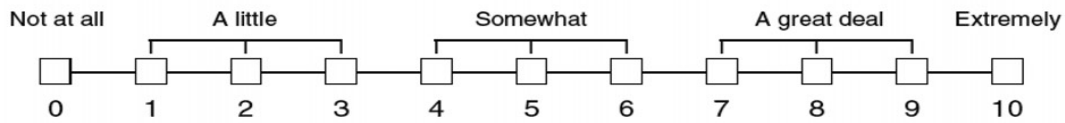

23. I felt disgusted by my recent gynecology exam or test results.

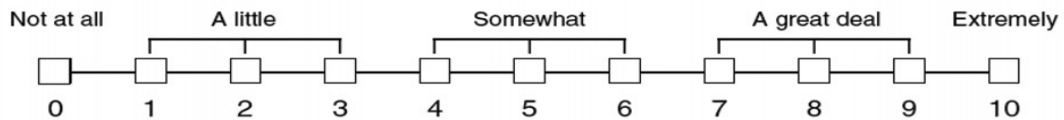

24. After my recent gynecology exam or test results, I am having less sex.

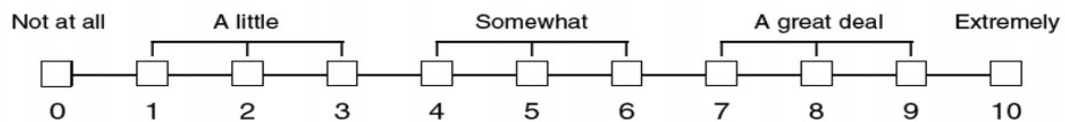

25. After my recent gynecological exam or test results, I feel satisfied with my sex life.

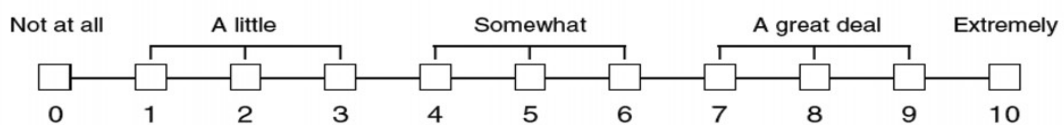

26. After my recent gynecological exam or test results, the quality of my sleep has decreased.

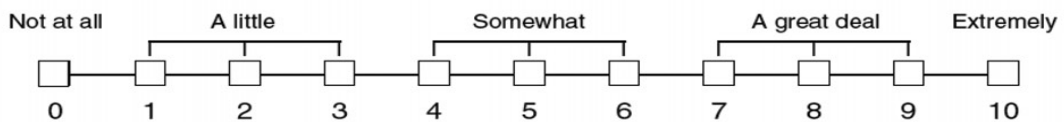

27. I felt relaxed after my recent gynecological exam.

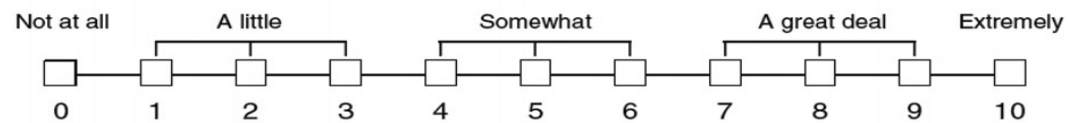

28. I felt my recent gynecology procedures were embarrassing.

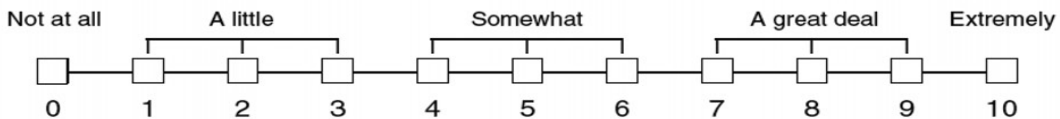

29. I felt the medical procedures at my recent gynecological exam were uncomfortable.

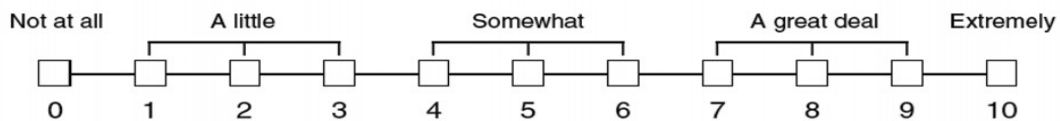

Supplement: MOESM1 [file 9499238]
